# Supplementary material for: Health-related reference intervals for heavy metals in non-exposed young adults
Source: publisher site journal article supplement (doi:10.1515/cclm-2025-0076), 2025-06-14
Supplement: Supplementary file 1 [file j_cclm-2025-0076_suppl_001.docx]

**Suppl.Table 1: Estimated 95th percentiles for the concentrations of the seven analyzed heavy metals, including 90% confidence intervals, as established by CLSI recommendations. All values reported in µg/L**

| Metals (concentrations) | Estimated 95th-percentile [90% CI] |
| --- | --- |
| Cadmium (µg/L) | 0.83 [0.61;1.59] |
| Cobalt (µg/L) | 0.67 [0.6;0.7] |
| Chromium (µg/L) | 3 [2.4;4.78] |
| Hg (µg/L) | 12.9 [10.11; 19.77] |
| Nickel (µg/L) | 3.34 [2.1;6.83] |
| Lead (µg/L) | 14.3 [13;19] |
| Zinc (µg/L) | 1420.5 [1363; 1639.3] |
